# Supplementary material
Source: HighWire-hosted journal article supplement (https://www.g3journal.org/content/suppl/2014/12/30/g3.114.015685)
Supplement: FigureS7.pdf [file FigureS7.pdf]

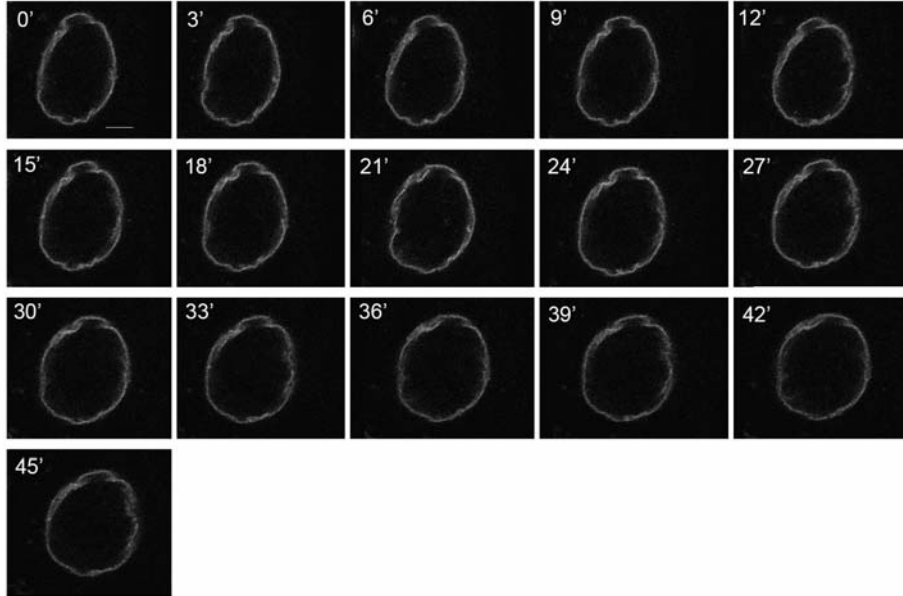

**Figure S7 Time lapse imaging of control salivary gland nucleus.** Time lapse imaging of the nuclear envelope without heat shock induction of Cap-H2. Imaging relied on a fluorescent nuclear envelope, marked with a GFP tagged nuclear pore complex. Images are displayed in three-minute increments. Minimal structural changes are observed over the course of the experiment. Scale bar is 10 microns. See supplementary video 2.
